# Supplementary material for: DDB2 modulates TGF-β signal transduction in human ovarian cancer cells by downregulating NEDD4L
Source: PubMed Central journal article supplement (PMC4652750; doi:10.1093/nar/gkv667), 2015-06-29
Supplement: supp_gkv667_nar-01271-v-2015-File003.pdf [file supp_gkv667_nar-01271-v-2015-File003.pdf]

## DDB2 modulates TGF- $\beta$ signal transduction in human ovarian cancer cells by downregulating NEDD4L

Zhao, et al

### Supplementary Figures

**Figure S1.** Transient downregulation of DDB2 enhances the transcription level of NEDD4L in ovarian cancer cell lines. Two different siRNAs sequences targeting DDB2 were transiently transfected into CP70-DDB2-3H cells (A), and siRNA SMARTpool designed to target human DDB2 were transiently transfected into PEO1 cells (B). After 48 h, total RNA was isolated and the mRNA levels of DDB2 and NEDD4L were detected using qRT-PCR. N = 3, Error bar: standard deviation. \*\*:  $P < 0.01$  compared with control siRNA-transfected cells.

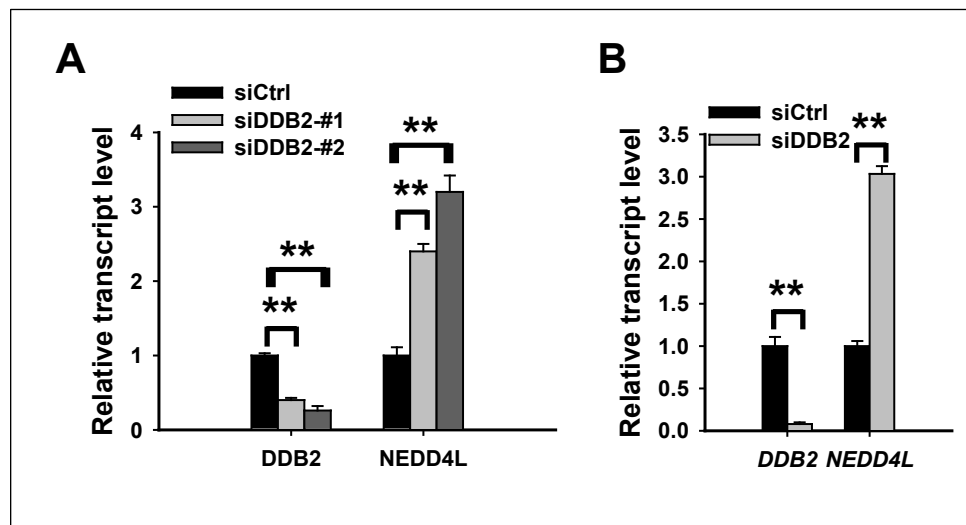

**Figure S2.** DDB-Cul4A E3 ubiquitin ligase is not involved in DDB2-mediated downregulation of NEDD4L. PEO1 cells were transfected with siRNA SMARTpool designed to target DDB1, Cul4A, DDB2, or siCtrl for 48 h. Whole cell lysates were prepared and subjected to immunoblotting to detect the protein level of NEDD4L. DDB1, Cul4A, and DDB2 were detected to show the knockdown efficiency. Tubulin was detected as a loading control.

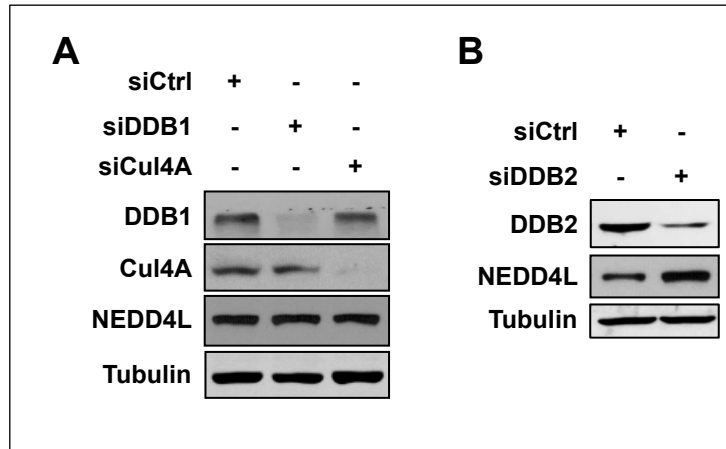

**Figure S3.** DDB2 binds to the promoter region of the NEDD4L gene. The ChIP assay was conducted to analyze the local enrichment of FLAG-tagged DDB2 across the *NEDD4L* promoter region in HeLa and FLAG-tagged DDB2 stably transfected HeLa cells (HeLa-DDB2). \*\*:  $P < 0.01$  compared with control siRNA-transfected cells.

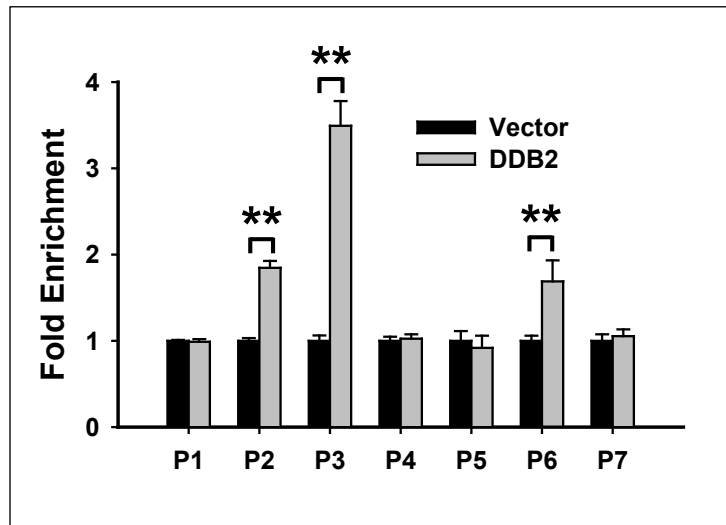

**Figure S4.** Prognostic significance of *NEDD4L* in ovarian cancer. The correlation of *NEDD4L* mRNA expression and progression-free survival (PFS) of ovarian cancer patient was analyzed using KM-plotter (<http://kmplot.com/analysis/>). The median expression value of *NEDD4L* was used as the cutoff, the patients were dichotomized into *NEDD4L*-high- or *NEDD4L*-low-expression groups. The effect of *NEDD4L* mRNA expression level on the PFS in 1511 ovarian cancer patients (A), and 1071 ovarian cancer patients at stage 3 or 4 (B) were analyzed and the Kaplan-Meier plots were generated.

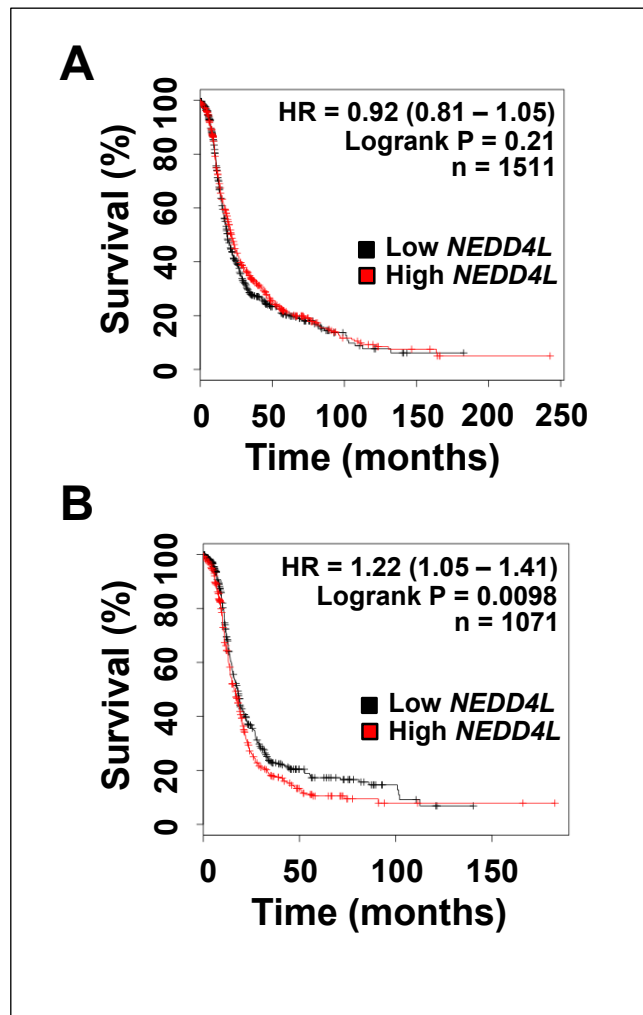

**Supplementary Table S1.** Antibodies used for ChIP, IP and Immunoblotting

| <b>Name</b>                            | <b>Catalog number</b> | <b>Company</b> |
|----------------------------------------|-----------------------|----------------|
| <b>For ChIP and IP</b>                 |                       |                |
| anti- Histone H3K27me3 antibody        | 39155                 | Active Motif   |
| anti- Histone H3K9me3 antibody         | 39161                 | Active Motif   |
| EZview™ Red ANTI-FLAG® M2 Affinity gel | F2426                 | Sigma          |
| Anti-EZH2 antibody                     | 5246                  | Cell Signaling |
| Normal rabbit IgG                      | sc-2027               | Santa Cruz     |
| <b>For Immunoblotting</b>              |                       |                |
| anti-DDB2                              | AF3297                | R & D Systems  |
| anti-DDB1                              | sc-25367              | Santa Cruz     |
| Anti-Cul4A                             | 2699                  | Cell Signaling |
| anti-NEDD4L                            | Ab131167              | Abcam          |
| anti-pSmad2                            | 3108                  | Cell Signaling |
| anti-Smad2                             | 5339                  | Cell Signaling |
| Anti-EZH2                              | 5246                  | Cell Signaling |
| Anti-SUZ12                             | 3737                  | Cell Signaling |
| Anti-Lamin B                           | sc-6216               | Santa Cruz     |

**Supplementary Table S2.** Primers for ChIP and RT-PCR

| <b>PCR primers</b>         | <b>Forward</b>       | <b>Reverse</b>         | <b>Length</b> |
|----------------------------|----------------------|------------------------|---------------|
| <b>RT-PCR</b>              |                      |                        |               |
| <i>LRP1B</i>               | TTCCAAGGCCTGGATCAAC  | GCTTCCTGACAGCACCATCT   | 274           |
| <i>PHLDA1</i>              | GCAGGGCATTGCTAAGTGG  | GAAGGCTGACCTCGGAATGT   | 268           |
| <i>NR2F1</i>               | TTCTTCAAGAGGAGCGTCCG | ATGTAGCCGGACAGGTAGCA   | 242           |
| <i>FAT1</i>                | CGGGTGAGCTCCACGAGA   | CCTTACTTCCCACGCTGGAT   | 279           |
| <i>NUPR1</i>               | CCCCTTCACCTCTGACTCC  | TCCGCAGTCCCGTCTCTATT   | 235           |
| <i>PAI1</i>                | CCTGGTTCTGCCAAGTTCT  | ATGCGGGCTGAGACTATGAC   | 225           |
| <i>PDGF</i>                | GAGTCGGCATGAATCGCTGC | CCCCTCTTCCCTCCGGGGT    | 179           |
| <i>Smad7</i>               | TCGGAAGTCAAGAGGCTGTG | GACAGTCTGCAGTTGGTTTGAG | 163           |
| <i>NEDD4L</i>              | AGAAACTGCCAGAGCTCAC  | TCGCCTCTGCAAAGTCTGT    | 213           |
| <i>DDB2</i>                | CTCCTCAATGGAGGGAACAA | GTGACCACCATTCGGCTACT   | 132           |
| <i>GAPDH</i>               | AAGGTGAAGTCCGGAGT    | GAAGATGGTGATGGGATTC    | 226           |
| <b>ChIP-PCR</b>            |                      |                        |               |
| <b>P1 (-1328 to -1118)</b> | GGCAAATGGAATGTTCTGCG | AGCCACCGTAGGATTCTTCC   | 211           |
| <b>P2 (-1135 to -944)</b>  | AGAGAAACGGTAGCTGGGTG | CCTTGCAGGGAACAAAACCA   | 192           |
| <b>P3 (-1008 to -769)</b>  | TCTGTTTTCGCGTGGGTG   | TGAGCTCGCTGTAACTGTG    | 240           |
| <b>P4 (-812 to -592)</b>   | AAGGGGTCTAGAAAATCC   | GTAAGTGGCGCGCTTG       | 221           |
| <b>P5 (-606 to -448)</b>   | CCAAGCGCGCCAGTACAC   | CCCCAAGCCAATCACAGG     | 159           |
| <b>P6 (-511 to -244)</b>   | CTGAACTCCGCCACCC     | GCTTCCCTCCCCGCG        | 268           |
| <b>P7 (-259 to -1)</b>     | TCGCGGGGAGGGAAAG     | GTTCTCCCCTCTGCCTC      | 259           |

**Supplementary Table S3. Genes upregulated by DDB2 in ovarian cancer cells identified by microarray analysis.**

CP70-DDB2: Averaged expression values in log scale in DDB2-overexpressing CP70 cells

CP70-Vector: Averaged expression values in log scale in Vector-transfected CP70 cells

DDB2 - Vector: Differences in logged expression values between DDB2-overexpressing and Vector-transfected CP70 cells

FC(DDB2/vector): Fold changes in the gene expression in DDB2-overexpressing cells over Vector-transfected cells

P-values: Statistic significance of the gene expression difference between two groups

| Number | Gene ID   | CP70-DDB2 | CP70-Vector | DDB2 - Vector | FC(DDB2/vector) | P-values |
|--------|-----------|-----------|-------------|---------------|-----------------|----------|
| 1      | NR2F1     | 8.43908   | 6.49272     | 1.94636       | 3.85400         | 0.00131  |
| 2      | ZCCHC2    | 6.75781   | 5.72978     | 1.02803       | 2.03923         | 0.00308  |
| 3      | DDB2      | 9.33286   | 7.54524     | 1.78763       | 3.45247         | 0.00333  |
| 4      | NAP1L3    | 7.09084   | 5.48058     | 1.61026       | 3.05307         | 0.00487  |
| 5      | TMX4      | 6.66634   | 5.65746     | 1.00888       | 2.01235         | 0.01291  |
| 6      | LOC729987 | 5.43987   | 4.15671     | 1.28315       | 2.43370         | 0.01475  |
| 7      | DPYD      | 6.89591   | 4.99416     | 1.90175       | 3.73667         | 0.01550  |
| 8      | LRRK2     | 5.71579   | 4.14246     | 1.57333       | 2.97591         | 0.01726  |
| 9      | KIAA0825  | 6.63242   | 4.22536     | 2.40706       | 5.30391         | 0.02019  |
| 10     | IFT57     | 8.11430   | 6.33978     | 1.77452       | 3.42123         | 0.02151  |
| 11     | FREM2     | 5.50494   | 4.32894     | 1.17600       | 2.25950         | 0.02159  |
| 12     | HMG5      | 8.36013   | 7.06106     | 1.29906       | 2.46069         | 0.02172  |
| 13     | MYOF      | 9.55043   | 8.46901     | 1.08141       | 2.11611         | 0.02575  |
| 14     | ZBTB20    | 5.92229   | 4.57138     | 1.35091       | 2.55074         | 0.02608  |
| 15     | EPG5      | 6.68866   | 5.67341     | 1.01525       | 2.02125         | 0.02793  |
| 16     | NID1      | 8.35794   | 6.94295     | 1.41499       | 2.66658         | 0.02804  |
| 17     | PCDH9     | 7.17695   | 4.49485     | 2.68210       | 6.41791         | 0.02877  |
| 18     | C16orf45  | 7.53985   | 5.52280     | 2.01705       | 4.04755         | 0.03009  |
| 19     | AKR1E2    | 6.39908   | 5.13962     | 1.25945       | 2.39405         | 0.03147  |
| 20     | PIK3C3    | 6.92813   | 5.67162     | 1.25651       | 2.38917         | 0.03153  |
| 21     | SNX7      | 8.01868   | 6.29648     | 1.72220       | 3.29939         | 0.03265  |
| 22     | LPIN1     | 7.73973   | 6.72916     | 1.01057       | 2.01470         | 0.03446  |
| 23     | TTC18     | 5.83853   | 4.67994     | 1.15858       | 2.23238         | 0.03553  |
| 24     | PLK2      | 8.66680   | 6.16034     | 2.50645       | 5.68221         | 0.03947  |
| 25     | LINC00478 | 7.00723   | 4.81966     | 2.18757       | 4.55538         | 0.04458  |
| 26     | CRYBG3    | 6.26126   | 4.75522     | 1.50604       | 2.84030         | 0.04491  |
| 27     | FBN1      | 7.76125   | 6.28781     | 1.47344       | 2.77684         | 0.04672  |
| 28     | PAM       | 7.38977   | 6.05614     | 1.33363       | 2.52036         | 0.04789  |

**Supplementary Table S4. Genes downregulated by DDB2 in ovarian cancer cells identified by microarray analysis**

CP70-DDB2: Averaged expression values in log scale in DDB2-overexpressing CP70 cells

CP70-Vector: Averaged expression values in log scale in Vector-transfected CP70 cells

Vector - DDB2: Differences in logged expression values between Vector-transfected and DDB2-overexpressing CP70 cell

FC(vector/DDB2): Fold changes in the gene expression in Vector-transfected cells over DDB2-overexpressing cells

P-values: Statistic significance of the gene expression difference between two groups

| Number | Gene ID  | CP70-DDB2 | CP70-Vector | Vector-DDB2 | FC(vector/DDB2) | P-values |
|--------|----------|-----------|-------------|-------------|-----------------|----------|
| 1      | OSMR     | 3.54755   | 5.71205     | 2.16450     | 4.48312         | 0.00063  |
| 2      | NEDD4L   | 4.07769   | 5.69877     | 1.62108     | 3.07604         | 0.00089  |
| 3      | LRP1B    | 3.23961   | 6.17455     | 2.93494     | 7.64723         | 0.00138  |
| 4      | FAT1     | 5.02133   | 7.21550     | 2.19417     | 4.57625         | 0.00248  |
| 5      | PHLDA1   | 5.37162   | 6.94212     | 1.57050     | 2.97008         | 0.00383  |
| 6      | LAMB1    | 4.53014   | 5.78686     | 1.25672     | 2.38952         | 0.00428  |
| 7      | FAM102B  | 4.19487   | 6.34290     | 2.14803     | 4.43222         | 0.00600  |
| 8      | KIRREL   | 5.26075   | 7.05788     | 1.79713     | 3.47527         | 0.00763  |
| 9      | LGALS3BP | 6.21287   | 7.53004     | 1.31717     | 2.49178         | 0.00766  |
| 10     | ALDH1A1  | 6.51544   | 10.79940    | 4.28396     | 19.48050        | 0.00781  |
| 11     | NRIP3    | 4.45797   | 5.91363     | 1.45566     | 2.74282         | 0.00841  |
| 12     | UBASH3B  | 3.86962   | 5.93005     | 2.06043     | 4.17111         | 0.00940  |
| 13     | VEGFC    | 4.16891   | 6.35076     | 2.18185     | 4.53736         | 0.01192  |
| 14     | COTL1    | 6.41494   | 7.87600     | 1.46106     | 2.75311         | 0.01195  |
| 15     | GLIPR1   | 4.37945   | 6.20285     | 1.82340     | 3.53914         | 0.01458  |
| 16     | MT1F     | 4.73071   | 5.98237     | 1.25166     | 2.38115         | 0.01514  |
| 17     | DHRS3    | 6.07603   | 7.15586     | 1.07984     | 2.11380         | 0.01522  |
| 18     | SLC25A24 | 4.14478   | 5.61335     | 1.46857     | 2.76747         | 0.01813  |
| 19     | LHX2     | 5.30145   | 6.63227     | 1.33082     | 2.51546         | 0.02569  |
| 20     | PDZD2    | 5.41908   | 6.90152     | 1.48245     | 2.79422         | 0.02798  |
| 21     | NT5C2    | 8.13125   | 9.35467     | 1.22342     | 2.33499         | 0.03063  |
| 22     | SEL1L3   | 5.32019   | 6.40397     | 1.08378     | 2.11958         | 0.03456  |
| 23     | ATP1B1   | 6.44373   | 8.12073     | 1.67700     | 3.19763         | 0.03528  |
| 24     | DUSP6    | 4.25347   | 7.41180     | 3.15833     | 8.92799         | 0.03680  |
| 25     | POPDC3   | 5.98273   | 7.17892     | 1.19619     | 2.29133         | 0.03890  |
| 26     | PTGS2    | 3.45214   | 5.13519     | 1.68305     | 3.21107         | 0.04367  |
| 27     | EPCAM    | 5.41782   | 6.55946     | 1.14164     | 2.20631         | 0.04439  |
| 28     | GCNT4    | 3.95954   | 5.92579     | 1.96625     | 3.90752         | 0.04841  |
| 29     | SIM2     | 4.43725   | 5.48309     | 1.04584     | 2.06457         | 0.04863  |
